# Supplementary material for: Exploring Inflammatory Asthma Phenotypes: Proteomic Signatures in Serum and Induced Sputum
Source: MDPI journal article supplement (doi:10.3390/ijms25063501), 2024-03-20
Supplement: s1 [file s1]

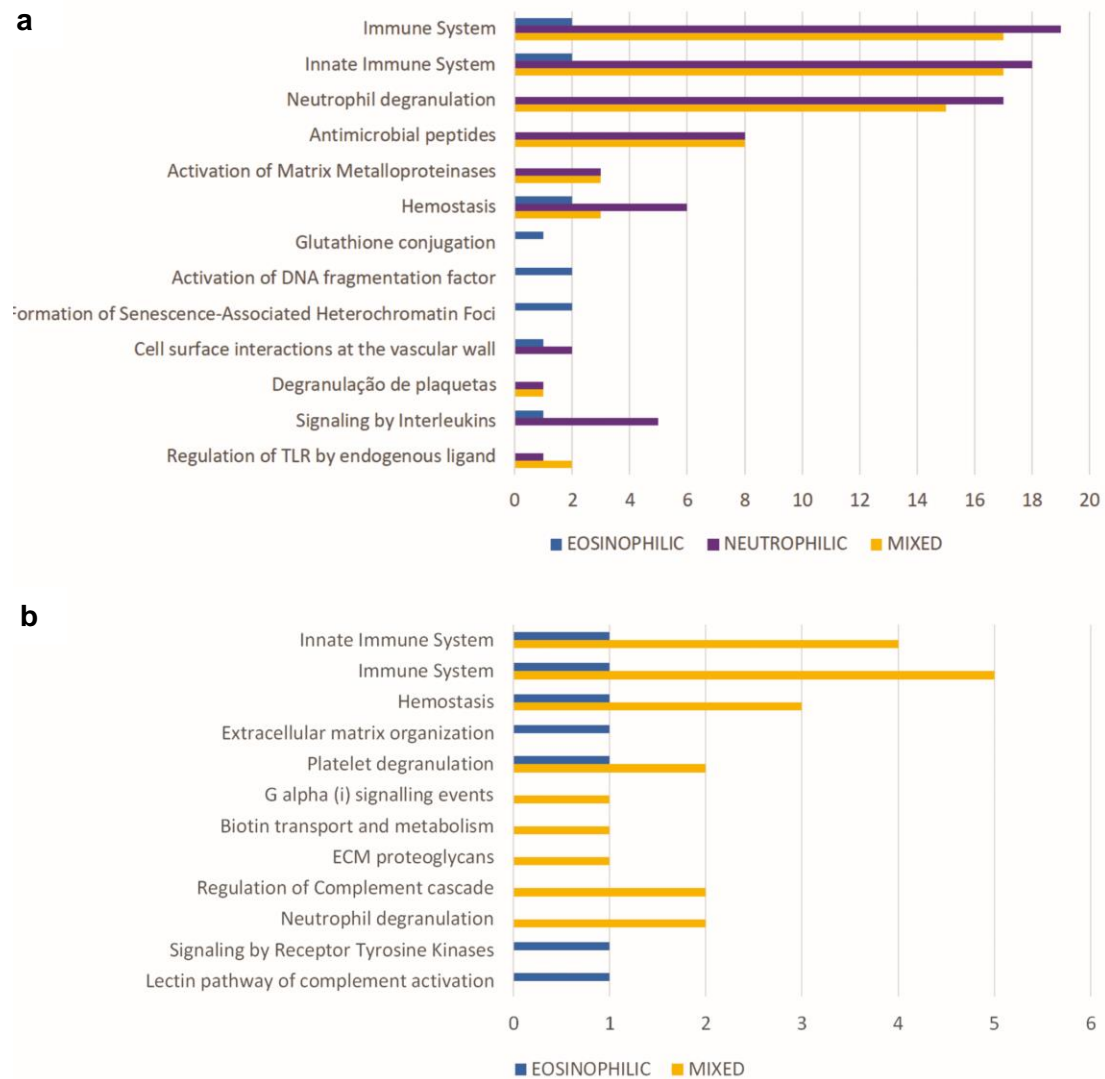

**Supplementary Figure S1.** Main enriched pathways of significantly altered proteins in induced sputum (**a**) and serum (**b**) of patients with eosinophilic (blue), neutrophilic (purple) and mixed (yellow) asthma. The number of significantly different proteins associated with each pathway identified by the database Reactome is shown in the bar graph.

**Supplementary Table S1.** List of the significantly different proteins in induced sputum of patients with eosinophilic, neutrophilic, mixed and paucigranulocytic asthma.

| Gene symbol     | Description                                      | Log Dif (E vs N) | Log Dif (E vs M) | Log Dif (E vs P) | Log Dif (N vs M) | Log Dif (N vs P) | Log Dif (M vs P) |
|-----------------|--------------------------------------------------|------------------|------------------|------------------|------------------|------------------|------------------|
| <i>S100P</i>    | Protein S100-P                                   | -4,18***         | -3,42**          | NS               | NS               | NS               | NS               |
| <i>S100A8</i>   | Protein S100-A8                                  | -2,96*           | -1,87*           | NS               | NS               | 4,38***          | 3,28***          |
| <i>CAMP</i>     | Cathelicidin antimicrobial peptide               | -13,08*          | NS               | NS               | NS               | 17,32**          | 13,25*           |
| <i>PGLYRP1</i>  | Peptidoglycan recognition protein 1              | -12,46*          | NS               | NS               | NS               | 14,92**          | NS               |
| <i>PIP</i>      | Prolactin-inducible protein                      | -1,64*           | -2,81***         | NS               | NS               | NS               | NS               |
| <i>AMYA1</i>    | Alpha-amylase 1                                  | -4,046*          | -5,55**          | NS               | NS               | NS               | 2,93*            |
| <i>CST4</i>     | Cystatin-S                                       | -2,10*           | -2,76*           | NS               | NS               | 2,58**           | 3,23**           |
| <i>KLK1</i>     | Kallikrein-1                                     | -2,78*           | -3,11**          | NS               | NS               | NS               | 1,58*            |
| <i>TMSB4X</i>   | Thymosin beta-4                                  | -2,44*           | NS               | NS               | NS               | NS               | NS               |
| <i>CRISP3</i>   | Cysteine-rich secretory protein 3                | -1,67*           | -1,80*           | NS               | NS               | 2,616*           | 2,74*            |
| <i>GSTA1</i>    | Glutathione S-transferase A1                     | 11,84*           | NS               | NS               | NS               | NS               | NS               |
| <i>DSG3</i>     | Desmoglein-3                                     | NS               | -<br>13,35**     | NS               | NS               | NS               | 14,43**          |
| <i>PRRL4</i>    | Proline-rich protein 4                           | NS               | -2,77*           | NS               | NS               | NS               | NS               |
| <i>LPO</i>      | Lactoperoxidase                                  | NS               | -1,29*           | NS               | NS               | NS               | NS               |
| <i>BPIFA1</i>   | BPI fold-containing family A member 1            | NS               | -10,70*          | NS               | -2,95*           | NS               | NS               |
| <i>ZG16B</i>    | Zymogen granule protein 16 homolog B             | NS               | -2,04*           | NS               | NS               | NS               | NS               |
| <i>CA6</i>      | Carbonic anhydrase 6                             | NS               | -2,99*           | NS               | NS               | NS               | NS               |
| <i>MIF</i>      | Macrophage migration inhibitory factor           | NS               | 12,84*           | NS               | 13,86*           | NS               | NS               |
| <i>MUC5AC</i>   | Mucin-5AC                                        | NS               | NS               | 13,41*           | NS               | NS               | NS               |
| <i>SMR3B</i>    | Submaxillary gland androgen-regulated protein 3B | NS               | NS               | 3,23*            | NS               | 2,82*            | 4,13**           |
| <i>H1-5</i>     | Histone H1.5                                     | NS               | NS               | 13,12*           | NS               | NS               | NS               |
| <i>LACRT</i>    | Extracellular glycoprotein lacritin              | NS               | NS               | 13,34*           | NS               | NS               | NS               |
| <i>BASP1</i>    | Brain acid soluble protein 1                     | NS               | NS               | 11,47*           | NS               | NS               | NS               |
| <i>H1-2</i>     | Histone H1.2                                     | NS               | NS               | 10,68*           | NS               | 11,33*           | NS               |
| <i>IGHV3-66</i> | Immunoglobulin heavy variable 3-66               | NS               | NS               | NS               | -2,64*           | NS               | NS               |
| <i>ANXA1</i>    | Annexin A1                                       | NS               | NS               | NS               | 2,47*            | 9,21*            | NS               |
| <i>ELANE</i>    | Neutrophil elastase                              | NS               | NS               | NS               | NS               | 4,23**           | 3,01**           |
| <i>PRB1</i>     | Basic salivary proline-rich protein 1            | NS               | NS               | NS               | NS               | 20,09**          | NS               |
| <i>APOA2</i>    | Apolipoprotein A-II                              | NS               | NS               | NS               | NS               | 15,08**          | NS               |
| <i>CTSG</i>     | Cathepsin G                                      | NS               | NS               | NS               | NS               | 15,33**          | 13,77*           |
| <i>CALML5</i>   | Calmodulin-like protein                          | NS               | NS               | NS               | NS               | 13,58**          | 13,48**          |

|                  |                                                      |    |    |    |    |        |        |
|------------------|------------------------------------------------------|----|----|----|----|--------|--------|
| <i>DEFA3</i>     | Neutrophil defensin 3                                | NS | NS | NS | NS | 3,44** | 2,90** |
| <i>MPO</i>       | Myeloperoxidase                                      | NS | NS | NS | NS | 3,52*  | 2,88** |
| <i>LDHA</i>      | L-lactate dehydrogenase A                            | NS | NS | NS | NS | 12,41* | 11,97* |
| <i>PRTN3</i>     | Myeloblastin                                         | NS | NS | NS | NS | 3,26*  | 2,80** |
| <i>HBB</i>       | Hemoglobin subunit beta                              | NS | NS | NS | NS | 12,61* | NS     |
| <i>ANXA2</i>     | Annexin A2                                           | NS | NS | NS | NS | 10,96* | NS     |
| <i>RETN</i>      | Resistin                                             | NS | NS | NS | NS | 11,17* | NS     |
| <i>S100A7</i>    | Protein S100-A7                                      | NS | NS | NS | NS | 10,73* | 9,99*  |
| <i>CD44</i>      | CD44 antigen                                         | NS | NS | NS | NS | 12,33* | NS     |
| <i>ARHGDI B</i>  | Rho GDP-dissociation inhibitor 2                     | NS | NS | NS | NS | 9,70*  | 9,04*  |
| <i>SPRR3</i>     | Small proline-rich protein 3                         | NS | NS | NS | NS | 9,44*  | NS     |
| <i>MMP9</i>      | Matrix metalloproteinase-9                           | NS | NS | NS | NS | 7,41*  | 7,04*  |
| <i>DMBT1</i>     | Deleted in malignant brain tumors 1 protein          | NS | NS | NS | NS | NS     | 1,32*  |
| <i>CD14</i>      | Monocyte differentiation antigen CD14                | NS | NS | NS | NS | NS     | 10,93* |
| <i>GAPDH</i>     | Glyceraldehyde-3-phosphate dehydrogenase             | NS | NS | NS | NS | NS     | 2,55*  |
| <i>SH3BGR L3</i> | SH3 domain-binding glutamic acid-rich-like protein 3 | NS | NS | NS | NS | NS     | 10,85* |
| <i>PRB2</i>      | Basic salivary proline-rich protein 2                | NS | NS | NS | NS | NS     | 13,17* |
| <i>GPI</i>       | Glucose-6-phosphate isomerase                        | NS | NS | NS | NS | NS     | 11,04* |
| <i>HV64D</i>     | Immunoglobulin heavy variable 3-64D                  | NS | NS | NS | NS | NS     | 10,74* |
| <i>CAP1</i>      | Adenylyl cyclase-associated protein 1                | NS | NS | NS | NS | NS     | 9,02*  |
| <i>CSTA</i>      | Cystatin-A                                           | NS | NS | NS | NS | NS     | 11,31* |

\* p < 0,05. \*\* p < 0,01. \*\*\* p < 0,001.

E, eosinophilic asthma; N, neutrophilic asthma; P, paucigranulocytic asthma; M, mixed granulocytic asthma; NS, not significant.

**Supplementary Table S2.** List of the significantly different proteins in serum of patients with eosinophilic, neutrophilic, mixed and paucigranulocytic asthma.

| Gene symbol   | Description                                     | Log Dif (E vs N) | Log Dif (E vs M) | Log Dif (E vs P) | Log Dif (N vs M) | Log Dif (N vs P) | Log Dif (M vs P) |
|---------------|-------------------------------------------------|------------------|------------------|------------------|------------------|------------------|------------------|
| <i>FCN3</i>   | Ficolin-3                                       | 12,83*           | 9,55*            | NS               | NS               | NS               | NS               |
| <i>CA1</i>    | Carbonic anhydrase 1                            | NS               | -3,20*           | NS               | NS               | NS               | NS               |
| <i>C1QA</i>   | Complement C1q subcomponent subunit A           | NS               | NS               | NS               | NS               | NS               | 2,51*            |
| <i>PF4</i>    | Platelet factor 4                               | NS               | -3,86**          | NS               | -3,22**          | NS               | NS               |
| <i>VTN</i>    | Vitronectin                                     | NS               | -1,15*           | NS               | -1,80**          | NS               | NS               |
| <i>SHBG</i>   | Sex hormone-binding globulin                    | NS               | -2,88*           | NS               | NS               | NS               | NS               |
| <i>THBS1</i>  | Thrombospondin-1                                | NS               | NS               | 10,92*           | NS               | NS               | NS               |
| <i>LAMP2</i>  | Lysosome-associated membrane glycoprotein 2     | NS               | NS               | NS               | NS               | NS               | 10,70*           |
| <i>BTB</i>    | Biotinidase                                     | NS               | NS               | NS               | NS               | NS               | 2,00*            |
| <i>CRISP3</i> | Cysteine-rich secretory protein 3               | NS               | -9,93*           | NS               | -8,58*           | NS               | NS               |
| <i>TGFBI</i>  | Transforming growth factor-beta-induced protein | NS               | NS               | NS               | NS               | NS               | 10,37*           |
| <i>PRG4</i>   | Proteoglycan 4                                  | NS               | NS               | NS               | NS               | NS               | 8,32*            |

\*  $p < 0,05$ . \*\*  $p < 0,01$ .

E, eosinophilic asthma; N, neutrophilic asthma; P, paucigranulocytic asthma; M, mixed granulocytic asthma; NS, not significant.
